# Supplementary material for: Evolutionary history and phylogeographic relationships of shrews from Sorex araneus group
Source: PubMed Central journal article supplement (PMC5484494; doi:10.1371/journal.pone.0179760), 2017-06-26
Supplement: pone.0179760.s001.pdf [file pone.0179760.s001.pdf]

**S1 Table.** Nucleotide substitution models applied in phylogenetic inferring for three alignment sets.

| Program          | Partition           | Sequence alignment sets   |                           |                      |
|------------------|---------------------|---------------------------|---------------------------|----------------------|
|                  |                     | (1) 111 taxa, 1011 bp     | (2) 140 taxa, 1011 bp     | (3) 93 taxa, 1140 bp |
| MrBayes          | 1. codon position   | mixed+ $\Gamma$ +I        | mixed+ $\Gamma$ +I        | mixed+ $\Gamma$ +I   |
|                  | 2. codon position   | mixed+ $\Gamma$ +I        | mixed+ $\Gamma$ +I        | mixed+ $\Gamma$ +I   |
|                  | 3. codon position   | mixed+ $\Gamma$ +I        | mixed+ $\Gamma$ +I        | mixed+ $\Gamma$ +I   |
| TreeFinder       | 1. codon position   | TN+ $\Gamma$              | HKY+ $\Gamma$             | HKY+ $\Gamma$        |
|                  | 2. codon position   | HKY{Ts=3, Tv=1}+ $\Gamma$ | HKY{Ts=3, Tv=1}+ $\Gamma$ | HKY{Ts=3, Tv=1}      |
|                  | 3. codon position   | GTR+ $\Gamma$             | TN+ $\Gamma$              | J2+ $\Gamma$         |
| Beast            | 1. codon position   | 011020+ $\Gamma$          | NA                        | NA                   |
|                  | 2. codon position   | F81                       | NA                        | NA                   |
|                  | 3. codon position   | 012343+ $\Gamma$          | NA                        | NA                   |
| morePhyML & PAUP | All codon positions | 012030+ $\Gamma$ +I       | HKY+ $\Gamma$             | HKY+ $\Gamma$        |
