# Supplementary material for: Evolutionary history and phylogeographic relationships of shrews from Sorex araneus group
Source: PubMed Central journal article supplement (PMC5484494; doi:10.1371/journal.pone.0179760), 2017-06-26
Supplement: pone.0179760.s002.pdf [file pone.0179760.s002.pdf]

**S2 Table.** Parameters and the Akaike information criterion (AIC) for different diversification models fitted to the time-calibrated phylogeny.

| Model description                                                                                                                        | Model                          | Parameters                                                                                                                                                         | AIC     | $\Delta$ AIC |
|------------------------------------------------------------------------------------------------------------------------------------------|--------------------------------|--------------------------------------------------------------------------------------------------------------------------------------------------------------------|---------|--------------|
| Constant-rate models                                                                                                                     | Pure birth (Yule)              | $\lambda=1.760$                                                                                                                                                    | -723.89 | 35.48        |
|                                                                                                                                          | Constant-rate birth–death (BD) | $\lambda=2.598$<br>$\mu=1.643$                                                                                                                                     | -730.44 | 28.93        |
| Variable-rate models assuming different speciation rates within specified time intervals                                                 | Yule2rate                      | $\lambda_1=1.891$<br>$t_1=0.048$<br>$\lambda_2=0.375$                                                                                                              | -745.77 | 13.6         |
|                                                                                                                                          | Yule3rate                      | $\lambda_1=0.662$<br>$t_1=0.796$<br>$\lambda_2=2.993$<br>$t_2=0.130$<br>$\lambda_3=1.021$                                                                          | -759.25 | 0.12         |
|                                                                                                                                          | Yule4rate                      | $\lambda_1=0.662$<br>$t_1=0.796$<br>$\lambda_2=2.993$<br>$t_2=0.130$<br>$\lambda_3=1.433$<br>$t_3=0.048$<br>$\lambda_4=0.375$                                      | -759.37 | 0.00         |
|                                                                                                                                          | Yule5rate                      | $\lambda_1=0.662$<br>$t_1=0.796$<br>$\lambda_2=2.697$<br>$t_2=0.402$<br>$\lambda_3=337.53$<br>$t_3=0.402$<br>$\lambda_4=3.100$<br>$t_4=0.130$<br>$\lambda_5=1.021$ | -759.08 | 0.30         |
| Variable-rate model assuming decreasing diversification through time in relation to increasing diversity with exponential fitting        | DDX                            | $\lambda=0.583$<br>$x=-0.308$                                                                                                                                      | -733.28 | 26.10        |
| Variable-rate model assuming decreasing diversification through time in relation to increasing diversity with logistic fitting           | DDL                            | $\lambda=1.760$<br>$k=1840527$                                                                                                                                     | -721.89 | 37.48        |
| Variable-rate model assuming decreasing diversification through time caused by decreasing speciation rate                                | SPVAR                          | $\lambda=2.608$<br>$\mu=1.647$<br>$k=0.001$                                                                                                                        | -728.41 | 30.97        |
| Variable-rate model assuming decreasing diversification through time caused by increasing extinction rate                                | EXVAR                          | $\lambda=2.597$<br>$\mu=1.641$<br>$z=889.05$                                                                                                                       | -728.44 | 30.93        |
| Variable-rate model assuming decreasing diversification through time caused by decreasing speciation rate and increasing extinction rate | BOTHVAR                        | $\lambda=2.609$<br>$\mu=1.648$<br>$k=0.001$<br>$z=886.94$                                                                                                          | -726.41 | 32.97        |

$\lambda$ , speciation;  $\mu$ , extinction;  $t$ , time of rate-shift in millions of years ago;  $x$ , parameter controlling the magnitude of the rate change;  $K$ , parameter analogous to the ‘carrying capacity’ parameter in population ecology;  $k$ , parameter of the exponential change in speciation rate;  $z$ , parameter of the exponential change in extinction rate.
