# Supplementary material for: Evolutionary history and phylogeographic relationships of shrews from Sorex araneus group
Source: PubMed Central journal article supplement (PMC5484494; doi:10.1371/journal.pone.0179760), 2017-06-26
Supplement: pone.0179760.s003.pdf [file pone.0179760.s003.pdf]

**S3 Table.** The oldest fossil records of selected members of *Sorex araneus* group.

| Species name             | Age                                          | Locality                                                                                | Reference |
|--------------------------|----------------------------------------------|-----------------------------------------------------------------------------------------|-----------|
| <i>Sorex antinorii</i>   | Late Early Toringian (0.350 Mya)             | Loara and Sant'Agostino (Italy)                                                         | [1,2]     |
| <i>Sorex arcticus</i>    | Late Irvingtonian (0.900-0.690 Mya)          | Hansen Bluff (Alamosa Co., Colorado, USA),<br>Trout Cave (Pendleton Co., Virginia, USA) | [3,4]     |
| <i>Sorex coronatus</i>   | Middle Pleistocene (MIS 15, 0.621-0.563 Mya) | Carpentier Quarry (Abbeville, France)                                                   | [5,6]     |
| <i>Sorex daphaenodon</i> | Olyorian formation (0.800-0.950 Mya)         | Kolyma Lowland (Yakutia, Russia)                                                        | [7,8]     |
| <i>Sorex samniticus</i>  | Early Biharian (1.100 Mya)                   | Monte Peglia (Italy)                                                                    | [2]       |
| <i>Sorex satunini</i>    | Middle Pleistocene (0.360 Mya)               | Treugolnaya Cave (Northern Caucasus, Russia)                                            | [9,10]    |
| <i>Sorex tundrensis</i>  | Early Pleistocene (0.700 Mya)                | Moneron Island (Russia)                                                                 | [11,12]   |

1. Kostakis T, Marcolini F, De Rita D, Conti M, Esu D (2011) Three Late Pleistocene small mammal faunas from the Baccano maar (Rome, central Italy). *Bollettino della Società Paleontologica Italiana Modena* 50: 103-110.
2. Kotsakis T, Abbazzi L, Angelone C, Argenti P, Barisone G, et al. (2003) Plio-Pleistocene biogeography of Italian mainland micromammals. *Deinsea* 10: 313-342.
3. Rogers KL, Repenning CA, Forester RM, Larson EE, Hall SA, et al. (1985) Middle Pleistocene (Late Irvingtonian: Nebraskan) climatic changes in south-central Colorado. *National Geographic Research* 1: 535-563.
4. Kirkland G, Schmidt D (1996) *Sorex arcticus*. *Mammalian Species* 524: 1-5.
5. Rzebik-Kowalska B (2009) Biodiversity of Polish fossil insectivores (Erinaceomorpha, Soricomorpha, Insectivora, Mammalia) compared to the European and global faunas. *Institute of Systematic and Evolution of Animals, Polish Academy of Sciences, Kraków*.
6. Antoine P, Moncel M-H, Limondin-Lozouet N, Loch J-L, Bahain J-J, et al. (2016) Palaeoenvironment and dating of the Early Acheulean localities from the Somme River basin (Northern France): New discoveries from the High Terrace at Abbeville-Carrière Carpentier. *Quaternary Science Reviews* 149: 338-371.
7. Sher A (1974) Pleistocene mammals and stratigraphy of the Far Northeast USSR and North America. *International Geology Review* 16: 1-284.
8. Virina E, Zazhigin V, Sher A (1984) Paleomagnetic characteristic of the type sites of the Olyorian Faunal complex (Kolyma Lowland). *Izvestia of Russian Academy of Science, Sergeol* 11: 61-71.
9. Zaitsev MV, Baryshnikov GF (2002) Pleistocene Soricidae (Lipotyphla, Insectivora, Mammalia) from Treugolnaya Cave, Northern Caucasus, Russia. *Acta Zoologica Cracoviensia* 45: 283-305.
10. Zaitsev MV, Osipova V (2005) Taxonomy of Middle and Late Pleistocene shrews from the Northern Caucasus. In: Merritt JF, Churchfield S, Hutterer R, Sheftel BI, editors. *Advances in the Biology of Shrews II* New York: International Society of Shrew Biologists. pp. 49-62.
11. Volobouev V, Dutrillaux B (1991) Chromosomal evolution and phylogenetic relationships of the *Sorex araneus-arcticus* species group. In: Hausser J, editor. *The cytogenetics of the Sorex araneus group and related topics Proceedings of the ISACC's Second International Meeting Mémoires de la Société Vaudoise des Sciences Naturelles*. Zürich, Schweiz: Ein Dienst der ETH-Bibliothek. pp. 131-139.
12. Okhotina MV (1983) A taxonomic revision of *Sorex arcticus* Kerr, 1792 (Soricidae, Insectivora). *Zoologicheskii Zhurnal* 62: 409-417.
